# Supplementary material for: Prolonged PSA stabilization and overall survival following sipuleucel-T monotherapy in metastatic castration-resistant prostate cancer patients
Source: PubMed Central journal article supplement (PMC6853838; doi:10.1038/s41391-019-0144-3), 2019-04-12

**Supplemental Figure 1: OS for Duke patients. A: Kaplan-Meier plot of overall survival calculated from the start of Sipuleucel-T to death or last follow-up in the Duke cohort.**

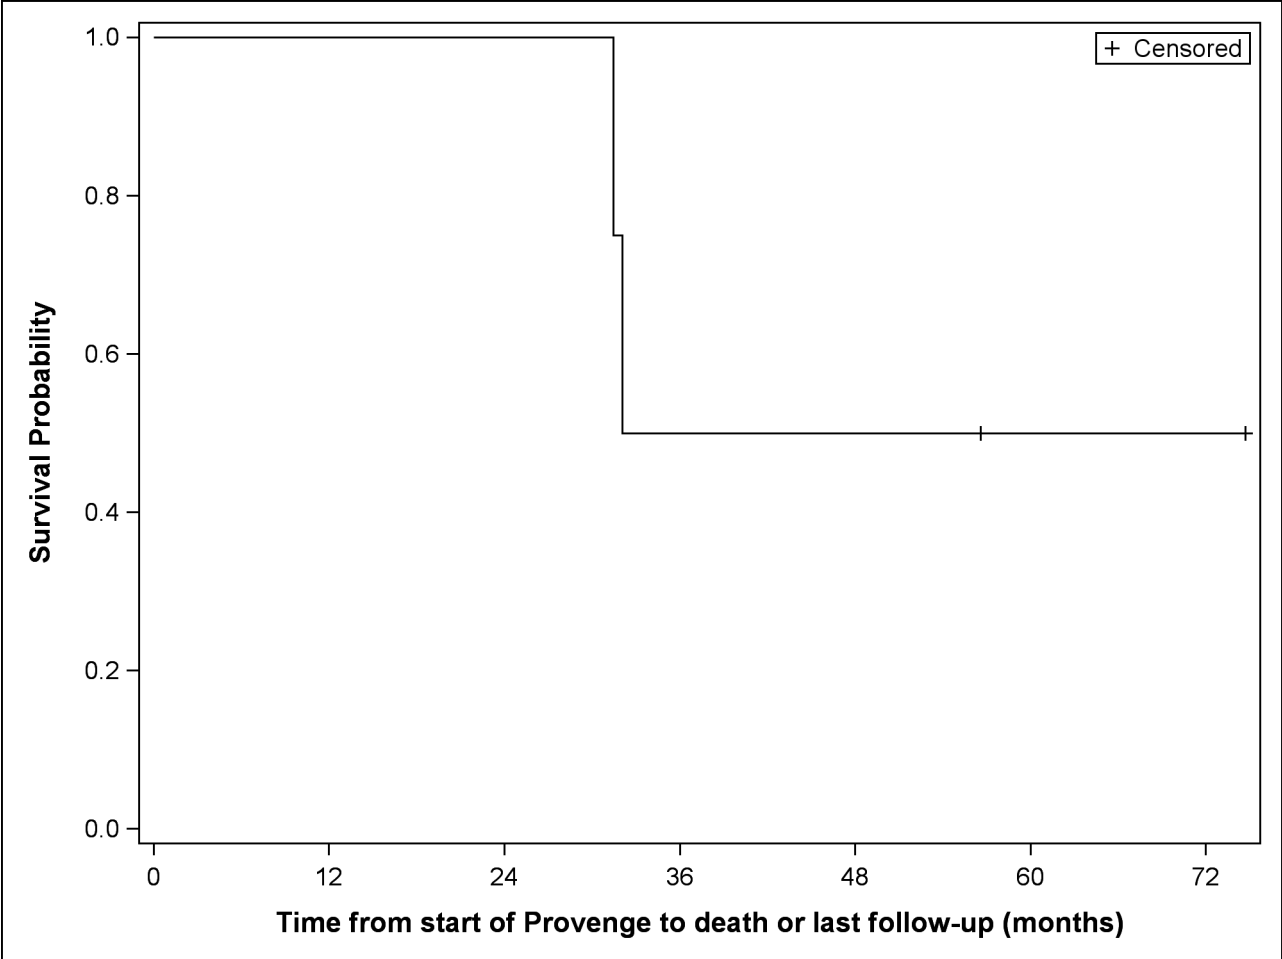

Supplement: 41391_2019_144_MOESM1_ESM.pdf [file 41391_2019_144_MOESM1_ESM.pdf]
