# Supplementary material for: Prolonged PSA stabilization and overall survival following sipuleucel-T monotherapy in metastatic castration-resistant prostate cancer patients
Source: PubMed Central journal article supplement (PMC6853838; doi:10.1038/s41391-019-0144-3), 2019-04-12
Supplement: 41391_2019_144_MOESM2_ESM.pdf [file 41391_2019_144_MOESM2_ESM.pdf]

**Supplemental Figure 2: Time to subsequent therapy. Kaplan-Meier plot of overall survival calculated from the start of Sipuleucel-T to time of subsequent therapy or last follow-up. Median time to subsequent therapy was 17.8 months (95% CI: 10.5, 25.3).**

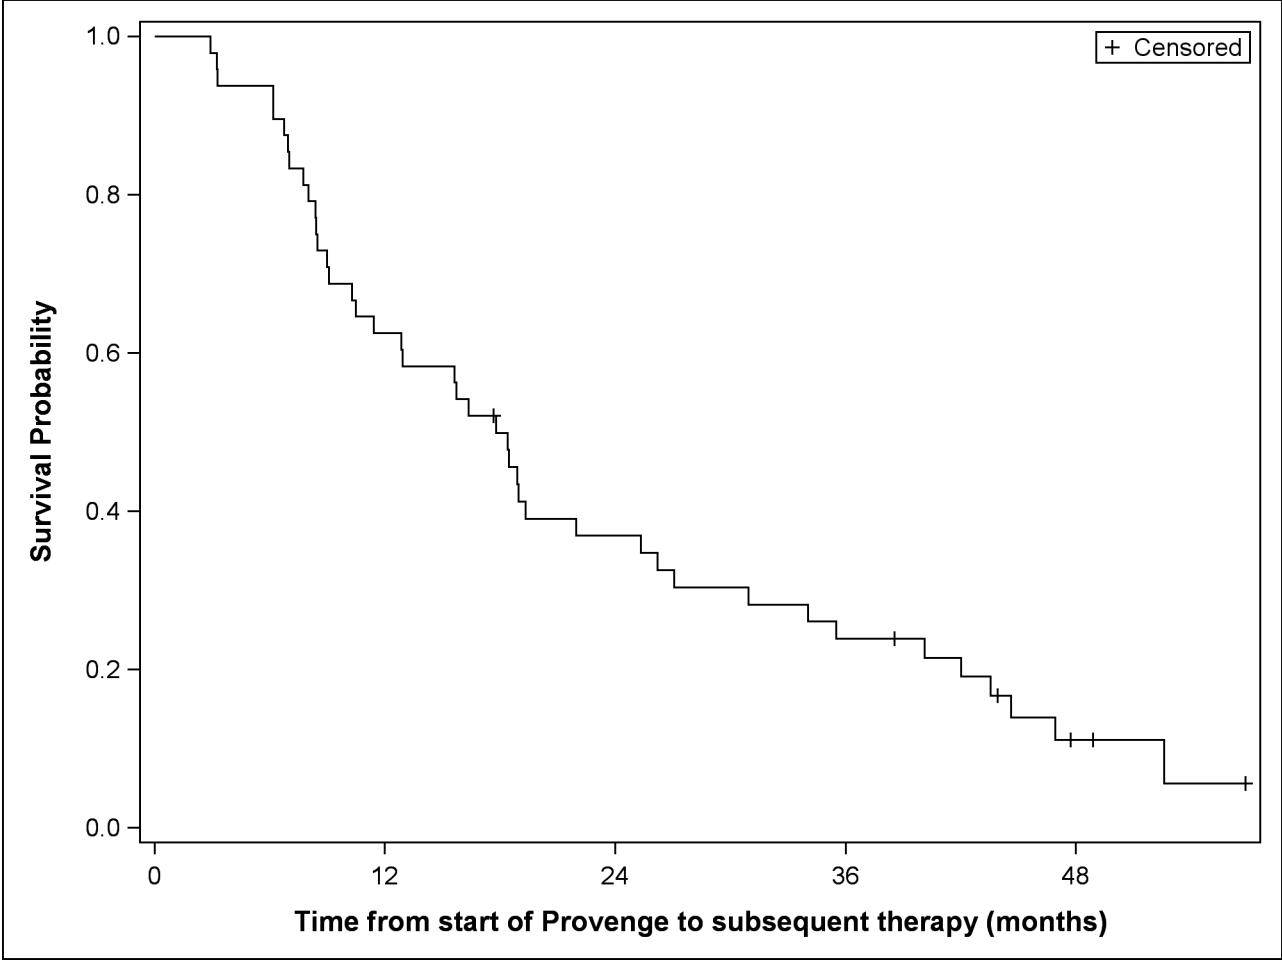

Median time to subsequent therapy: 17.8 months (95% CI: 10.5, 25.3)
